# Supplementary material for: Broadband Internet, market demogrpahics and hate groups
Source: Research Square preprint supplement (doi:10.21203/rs.3.rs-6707968/v1), 2025-05-28
Supplement: Supplementary file 1 [file 525241357a012e6700d0c521.docx]

**Broadband Internet, market demographics and hate groups**

Scott J. Savage and Bradley S. Wimmer[[1]](#footnote-1)

May 20, 2025

**Online appendices**

**Appendix A Hate groups and immigration**

**Table A1** Local hate-group chapters including other hate groups

**Table A2** Statewide and regional hate-group chapters including other hate groups

**Table A3** Home-country immigration shares 1980 to 2017

**Appendix B Variables**

**Table B1** Variable descriptions

Residential Internet Penetration

**Appendix C Linear regressions**

**Table C1** First-step OLS estimates of the Internet and Internet-youth interactions

**Table C2** 2SLS estimates of the linear model of market entry with Internet-youth and Internet-education interactions

**Table C3** First-step OLS estimates of the Internet and Internet-education interactions

**Table C4** First-step OLS estimates of the Internet and immigration

**Table C5** 2SLS estimates of the linear model of market entry with Internet-youth and Internet-education interactions and census division-year fixed effects

**Appendix D Robustness tests of market entry**

**Table D1** Ordered probit estimates of market entry with alternative hate group definitions

**Table D2** Cross-partial effects of the Internet on the probability of market entry from linear specifications with Internet-youth and Internet-education interactions

**Table D3** Cross-partial effects of the Internet on the probability of market entry from linear specifications with Internet-youth and Internet-education interactions and census division-year fixed effects

**Appendix A Hate groups and immigration**

| **Table A1** Local hate-group chapters including other hate groups | | | | | | |  | | |
| --- | --- | --- | --- | --- | --- | --- | --- | --- | --- |
| Census Region | 2000 | | | 2010 | | | 2017 | | |
|  | T | C | Total | T | C | Total | T | C | Total |
| Northeast (NW) | 19 | 30 | 49 | 17 | 34 | 51 | 12 | 15 | 27 |
| Midwest (MW) | 37 | 50 | 87 | 36 | 52 | 88 | 18 | 38 | 56 |
| South (S) | 100 | 61 | 161 | 134 | 58 | 192 | 59 | 59 | 118 |
| West (W) | 9 | 44 | 53 | 22 | 41 | 63 | 18 | 40 | 58 |
| Border | 5 | 6 | 11 | 2 | 4 | 6 | 2 | 2 | 4 |
| *NW & MW* | 0 | 1 | 1 | 0 | 1 | 1 | 0 | 0 | 0 |
| *NW & S* | 0 | 1 | 1 | 1 | 1 | 2 | 1 | 1 | 2 |
| *MW & S* | 4 | 3 | 7 | 0 | 1 | 1 | 1 | 1 | 2 |
| *MW & W* | 1 | 1 | 2 | 1 | 1 | 2 | 0 | 0 | 0 |
| Total | 170 | 191 | 361 | 211 | 189 | 400 | 109 | 154 | 263 |
| Traditional Groups | 2000 | | | 2010 | | | 2017 | | |
|  | T |  |  | T |  |  | T |  |  |
| KKK | 93 |  |  | 102 |  |  | 44 |  |  |
| White Nationalist | 77 |  |  | 109 |  |  | 65 |  |  |
| Total | 170 |  |  | 211 |  |  | 109 |  |  |
| Contemporary Groups | 2000 | | | 2010 | | | 2017 | | |
|  |  | C |  |  | C |  |  | C |  |
| Neo-Nazi |  | 154 |  |  | 111 |  |  | 27 |  |
| Racist Skinhead |  | 35 |  |  | 60 |  |  | 10 |  |
| Anti-Immigration |  | 2 |  |  | 11 |  |  | 21 |  |
| Anti-Muslim |  | 0 |  |  | 6 |  |  | 90 |  |
| Neo-Völkisch |  | 0 |  |  | 1 |  |  | 6 |  |
| Total |  | 191 |  |  | 189 |  |  | 154 |  |
| *NOTES*. T is traditional, C is contemporary. + Some hate groups are located in commuting zones that span multiple states that constitute Census-Region borders. The SPLC does not count entities that appear only in cyberspace because they are likely individual web publishers who falsely portray themselves as groups.  *SOURCE*. SPLC (2001, 2011, 2018b). | | | | | | | | | |

| **Table A2** Statewide and regional hate-group chapters including other hate groups[[2]](#footnote-2) | | | | | | | | | |
| --- | --- | --- | --- | --- | --- | --- | --- | --- | --- |
|  | 2000 |  |  | 2010 |  |  | 2017 |  |  |
| Region | Traditional | Contemporary | Total | Traditional | Contemporary | Total | Traditional | Contemporary | Total |
| Northeast | 0 | 0 | 0 | 18 | 15 | 33 | 10 | 31 | 41 |
| Midwest | 0 | 0 | 0 | 24 | 25 | 49 | 10 | 42 | 52 |
| South | 2 | 1 | 3 | 55 | 51 | 102 | 25 | 73 | 98 |
| West | 0 | 1 | 1 | 20 | 28 | 48 | 18 | 47 | 65 |
| Total | 2 | 2 | 4 | 117 | 115 | 232 | 63 | 193 | 256 |
|  |  |  |  |  |  |  |  |  |  |
| Traditional Groups | 2000 |  |  | 2010 |  |  | 2017 |  |  |
| KKK | 1 |  |  | 103 |  |  | 28 |  |  |
| White Nationalist | 1 |  |  | 14 |  |  | 35 |  |  |
| Total | 2 |  |  | 117 |  |  | 63 |  |  |
|  |  |  |  |  |  |  |  |  |  |
| Contemporary Groups |  | 2000 |  |  | 2010 |  |  | 2017 |  |
| Neo-Nazis |  | 2 |  |  | 53 |  |  | 94 |  |
| Racist Skinheads |  | 0 |  |  | 62 |  |  | 60 |  |
| Anti-Immigration |  | 0 |  |  | 0 |  |  | 1 |  |
| Anti-Muslim |  | 0 |  |  | 0 |  |  | 16 |  |
| Neo-Völkisch |  | 0 |  |  | 0 |  |  | 22 |  |
| Total |  | 2 |  |  | 115 |  |  | 193 |  |
| *NOTES*. T is traditional, C is contemporary. The SPLC does not count entities that appear only in cyberspace because they are likely individual web publishers who falsely portray themselves as groups.  *SOURCE*. SPLC (2001, 2011, 2018b). | | | | | | | | | |

| **Table A3** Home-country immigration shares 1980 to 2017 | | | | | | | | | | | | |
| --- | --- | --- | --- | --- | --- | --- | --- | --- | --- | --- | --- | --- |
|  |  | 1980 |  |  | 2000 |  |  | 2010 |  |  | 2017 |  |
| Rank | Country | Share | Out group | Country | Share | Out group | Country | Share | Out group | Country | Share | Out group |
| 1 | Mexico | 16.2% | 98.4% | Mexico | 28.5% | 99.1% | Mexico | 28.4% | 99.2% | Mexico | 24.9% | 99.2% |
| 2 | Germany | 7.9% | 4.9% | Philippines | 4.1% | 95.1% | India | 4.3% | 98.3% | India | 5.5% | 98.6% |
| 3 | Canada | 6.6% | 2.9% | Germany | 3.7% | 11.4% | Philippines | 4.3% | 95.9% | China | 4.7% | 98.7% |
| 4 | Italy | 6.2% | 1.2% | India | 3.2% | 97.7% | China | 3.7% | 98.7% | Philippines | 4.2% | 95.7% |
| 5 | UK | 5.1% | 3.9% | China | 3.1% | 98.2% | Vietnam | 3.0% | 98.7% | El Salvador | 3.0% | 99.2% |
| 6 | Cuba | 4.5% | 98.3% | Vietnam | 3.1% | 98.3% | El Salvador | 2.9% | 99.1% | Vietnam | 2.9% | 98.6% |
| 7 | USSR | 3.5% | 3.9% | Canada | 2.8% | 6.6% | Germany | 2.8% | 12.9% | Cuba | 2.8% | 98.8% |
| 8 | Philippines | 3.5% | 93.6% | USSR | 2.7% | 1.0% | USSR | 2.8% | 0.9% | USSR | 2.7% | 1.2% |
| 9 | Poland | 3.0% | 0.6% | Korea | 2.7% | 96.1% | Korea | 2.6% | 96.9% | Dom Rep | 2.6% | 99.1% |
| 10 | Korea | 2.1% | 95.6% | Cuba | 2.7% | 98.4% | Cuba | 2.6% | 98.5% | Germany | 2.4% | 14.5% |
| 11 | China | 2.1% | 94.5% | El Salvador | 2.5% | 98.2% | Canada | 2.2% | 10.6% | Korea | 2.3% | 96.2% |
| 12 | Japan | 2.0% | 69.3% | UK | 2.4% | 9.0% | Dom Rep | 2.1% | 99.4% | Guatemala | 2.1% | 98.9% |
| 13 | Vietnam | 1.7% | 97.5% | Dom Rep | 2.1% | 99.1% | Guatemala | 2.0% | 98.9% | Canada | 2.0% | 11.5% |
| 14 | Ireland | 1.5% | 0.6% | Jamaica | 1.7% | 97.8% | UK | 2.0% | 10.3% | UK | 1.8% | 11.6% |
| 15 | Portugal | 1.5% | 12.8% | Italy | 1.6% | 2.4% | Jamaica | 1.6% | 97.8% | Colombia | 1.7% | 98.6% |
| 16 | Greece | 1.5% | 1.5% | Colombia | 1.6% | 97.3% | Colombia | 1.6% | 98.4% | Jamaica | 1.6% | 97.9% |
| 17 | India | 1.5% | 92.9% | Guatemala | 1.5% | 97.7% | Haiti | 1.4% | 99.0% | Haiti | 1.5% | 98.8% |
| 18 | Jamaica | 1.4% | 95.6% | Poland | 1.5% | 0.6% | Honduras | 1.2% | 98.5% | Honduras | 1.4% | 98.8% |
| 19 | Dom Rep | 1.2% | 98.4% | Japan | 1.4% | 71.9% | Japan | 1.1% | 71.3% | Japan | 1.1% | 69.0% |
| 20 | Yugoslavia | 1.1% | 1.4% | Haiti | 1.3% | 98.8% | Poland | 1.1% | 0.4% | Africa, other | 1.1% | 89.9% |
|  | Total | 74.4% | 48.4% |  | 74.3% | 79.4% |  | 73.8% | 84.8% |  | 72.4% | 87.0% |
| *NOTES*. Country is immigrant’s home country (i.e., country where immigrant was born). Share is the home-country’s share of immigrant population living in the U.S. Out group is the share of home-country immigrants who are Hispanic or non-White.  *SOURCE*. IPUMS decennial census (1980, 2000), ACS (2016, 2017, 2018), Ruggles et al. (2022), NTIA (2001, 2010), and FCC (2022). | | | | | | | | | | | | |

**Appendix B Variables**

| **Table B1** Variable descriptions | | |
| --- | --- | --- |
| Variable | Description and data source |
| *Contemporary Hate* | Number of unique Neo-Nazi and Racist Skinhead local chapters operating in a commuting zone; set equal to three when three or more unique chapters are present in a commuting zone. Source: SPLC (2001, 2011, 2018b). |
| *Traditional Hate* | Number of unique Ku Klux Klan local chapters operating in a commuting zone; set equal to two when two or more unique chapters are present in a commuting zone. Source: SPLC (2001, 2011, 2018b). |
| *Any Hate* | Number of unique Neo-Nazi, Racist Skinhead, and Ku Klux Klan local chapters operating in a commuting zone; set equal to five when five or more unique chapters are present in a commuting zone. Source: SPLC (2001, 2011, 2018b). |
| *Internet* | The share of commuting-zone residences with a fixed Internet connection over 200 kbps in the downstream or upstream direction Source: NTIA (2001, 2010), and FCC (2022). |
| *Immigration* | The share of a commuting zone’s population that was not born in the United States. Source: IPUMS decennial census (1980, 2000), ACS (2009, 2010, 2011, 2016, 2017, 2018), Ruggles et al. (2022). |
| *Native Non-White* | The share of a commuting zone’s native population that is Black, Hispanic, Asian, or Other Race. Source: IPUMS decennial census (2000), ACS (2009, 2010, 2011, 2016, 2017, 2018), Ruggles et al. (2022). |
| *Uneducated Pop* | The number of native-born, non-Hispanic whites without high-school degrees and age 25 and above living in a commuting zone. Source: IPUMS decennial census (2000), ACS (2009, 2010, 2011, 2016, 2017, 2018), Ruggles et al. (2022). |
| *Educated Pop* | The number of native-born, non-Hispanic whites with at least a high-school degree and age 25 and above living in a commuting zone. Source: IPUMS decennial census (2000), ACS (2009, 2010, 2011, 2016, 2017, 2018), Ruggles et al. (2022). |
| *In-Group Income* | A commuting zone’s median income ($1,000’s) for households headed by native-born, non-Hispanic whites, in 2000 dollars. Source: IPUMS decennial census (2000), ACS (2009, 2010, 2011, 2016, 2017, 2018), Ruggles et al. (2022). |
| *Out-Group Income* | A commuting zone’s median income ($1,000’s) for households headed by out-group members who are non-white, Hispanic, or were not born in the United States, in 2000 dollars. Source: IPUMS decennial census (2000), ACS (2009, 2010, 2011, 2016, 2017, 2018), Ruggles et al. (2022). |
| *Evangelical* | The share of a commuting zone’s population that is evangelical Protestant. Source: The Association of Religion Data Archives. |
| *Protestant* | The share of a commuting zone’s population that is mainline Protestant. Source: The Association of Religion Data Archives. |
| *Republican* | The share of a commuting zone’s total voters who voted Republican in the most-recent Presidential election. Source: David Leip’s Atlas of U.S. Presidential Elections |
| *Youth* | The share of a commuting zone’s in-group population that is aged 19 and younger. Source: IPUMS decennial census (2000), ACS (2009, 2010, 2011, 2016, 2017, 2018), Ruggles et al. (2022). |
| *Klan 1924* | Equals one when a commuting zone had an active KKK chapter during the Klan’s second rise from 1915 in 1924, and zero otherwise. Source: Kneebone and Torres (2015). |
| *Confederate* | Equals one if the commuting zone includes a county located in a former Confederate state, and zero otherwise. |
| *Border* | Equals one if the commuting zone includes a county located in Texas, New Mexico, Arizona, or California, and zero otherwise. |
| *Density* | Number of Housing units per local road mile (S1400) in a commuting zone. Source: U.S. Census Bureau (2013), IPUMS decennial census (2000, 2010), ACS (2016, 2017, 2018). |
| *Commercial* | A commuting zone’s ten-year lagged share of labor-market participants in the finance, insurance, and real estate sectors; computer and data processing services, as well as the communications industries. Source: IPUMS decennial census (1990, 2000), ACS (2009, 2010, 2011), Ruggles et al. (2022). |
| *B* | Bartik Instrument that equals the sum over origin countries of the product of a commuting zone’s 1980 share of immigrants from an origin country and the national number of recent immigrants from that origin country. Source: IPUMS decennial census (1980, 2000), ACS (2009, 2010, 2011, 2016, 2017, 2018), Ruggles et al. (2022). |
| *Contemporary State Hate* | Number of statewide and regional Neo-Nazi and Racist Skinhead chapters operating in a state; set equal to three when three or more unique chapters are present in a state. Source: SPLC (2001, 2011, 2018b). |
| *Traditional State Hate* | Number of statewide and regional Ku Klux Klan chapters operating in a state; set equal to two when two or more unique chapters are present in a commuting zone. Source: SPLC (2001, 2011, 2018b). |
| *Year 2010* | Equals one when the year is 2010, and zero otherwise. |
| *Year 2017* | Equals one when the year is 2017, and zero otherwise. |

**Residential Internet Penetration**

We used data from the FCC and the NTIA to construct a measure of residential Internet penetration for all commuting zones in 2000, 2010 and 2017 (*Internetmt*). The FCC (2010, 2017) provide public data on the number of fixed residential Internet connections and households for each county in 2010 and 2017 in their *Form 477 Data on Fixed Internet Access Services* publications.[[3]](#footnote-3) We used the Form 477 data to calculate the share of residences in each county with a fixed Internet connection over 0.2 Mbps in at least the downstream or upstream direction in 2010 and 2017. County-level data on the number of fixed residential Internet connections are not available in 2000 and are interpolated. We used NTIA (2001, 2011) data on the number of fixed residential Internet connections and households to calculate Internet penetration for each metropolitan statistical area (MSA) in 2001 and 2010.[[4]](#footnote-4) We then used these data to construct the ratio of 2001 to 2010 Internet penetration for each MSA and matched the MSAs to counties using the appropriate FIPs codes. About five percent of counties could not be matched to an MSA. For these counties, we constructed the ratio of 2001 to 2010 Internet penetration for each state the county is located in. We completed the interpolation by multiplying the ratios by the FCC’s (2010) county-level data in 2010 to estimate the share of residences in each county with a fixed Internet connection over 0.2 Mbps in at least the downstream or upstream direction in 2000.

**Appendix C Linear regressions**

| **Table C1** First-step OLS estimates of the Internet and Internet-youth interactions | | | |
| --- | --- | --- | --- |
|  | Endogenous Internet | Endogenous Internet and interactions | |
|  | *Internetmt* | *Internetmt* | *Internetmt*×*Youthmt* |
| *Immigrationmt* | 0.987*** | 0.618* | 20.929*** |
|  | (0.343) | (0.337) | (7.313) |
| *Native Non-Whitemt* | -0.025 | -0.030 | 3.372 |
|  | (0.146) | (0.142) | (3.394) |
| *Uneducated Popmt* | -0.049*** | 0.034 | -0.509 |
|  | (0.015) | (0.024) | (0.486) |
| *Educated Popmt* | 0.022*** | 0.005 | 0.434* |
|  | (0.007) | (0.010) | (0.232) |
| *In-Group Incomemt* | -0.103 | -0.057 | 2.441 |
|  | (0.101) | (0.099) | (2.462) |
| *Out-Group Incomemt* | 0.101 | 0.103* | 1.357 |
|  | (0.062) | (0.061) | (1.477) |
| *Evangelicalmt* | 0.115 | 0.129* | 4.257** |
|  | (0.081) | (0.070) | (1.658) |
| *Protestantmt* | 0.294*** | 0.298*** | 6.277*** |
|  | (0.084) | (0.086) | (2.151) |
| *Conservativemt* | -0.198*** | -0.158*** | -5.553*** |
|  | (0.059) | (0.054) | (1.509) |
| *Youthmt* | -1.434*** | 0.522 | 24.015 |
|  | (0.290) | (0.911) | (17.657) |
| *Klanm* | -0.942* | -0.948* | -21.970* |
|  | (0.508) | (0.507) | (11.971) |
| *Confederatem* | -0.455 | -0.689 | -5.893 |
|  | (0.815) | (0.776) | (17.622) |
| *Densitymt* | 0.462*** | 1.067*** | 4.211 |
|  | (0.114) | (0.311) | (6.227) |
| *Commercialmt* | 1.619*** | 8.927** | 30.580 |
|  | (0.395) | (4.193) | (87.963) |
| *Densitymt*×*Youthmt* |  | -0.029** | 0.044 |
|  |  | (0.012) | (0.254) |
| *Commercialmt*×*Youthmt* |  | -0.295* | 0.648 |
|  |  | (0.163) | (3.573) |
| *Densitymt*×*Educated Popmt* |  |  |  |
|  |  |  |  |
| *Commercialmt*×*Educated Popmt* |  |  |  |
|  |  |  |  |
| *Densitymt*×*Uneducated Popmt* |  |  |  |
|  |  |  |  |
| *Commercialmt*×*Uneducated Popmt* |  |  |  |
|  |  |  |  |
| *Year 2010t* | 41.214*** | 42.688*** | 1,155.782*** |
|  | (1.045) | (1.065) | (25.991) |
| *Year 2017t* | 58.613*** | 59.749*** | 1,552.545*** |
|  | (1.786) | (1.839) | (44.867) |
| *Border 2000mt* | 2.163** | 2.551*** | 117.572*** |
|  | (0.890) | (0.867) | (21.055) |
| *Border 2010mt* | -3.051** | -2.955** | -75.372** |
|  | (1.353) | (1.387) | (32.274) |
| *Border 2017mt* | -0.926 | -0.270 | -48.023 |
|  | (1.589) | (1.607) | (36.645) |
| Constant | 9.716** | -6.735 | -1,103.783*** |
|  | (3.982) | (14.335) | (313.216) |
| Relevance | F(2, 721) = 19.2*** | F(4, 721) = 12.6*** | F(4, 721) = 9.8*** |
|  | (0.00) | (0.00) | (0.00) |
| CRE | χ2(12, 721) =15.8*** | χ2(14, 721) =10.2*** | χ2(14, 721) =8.5*** |
|  | (0.00) | (0.00) | (0.00) |
| R-Squared | 0.907 | 0.909 | 0.905 |
| *NOTES*. 2,166 observations. Robust standard errors, clustered by commuting zone, in parentheses. P-values in parentheses for all F and Chi-Squared tests. ***Significant at the 0.01 level; **significant at the 0.05 level; *significant at the 0.1 level. Relevance F-Statistic tests the null hypothesis that the coefficients of the excluded exogenous variables (*Densitymt*, *Commercialmt*, *Densitymt*×*Youthmt*, *Commercialmt*×*Youthmt*, *Densitymt*×*Educated In-Group Popmt*, *Commercialmt* ×*Educated In-Group Popmt,* and *Bmt*) jointly equal zero within each equation. CRE tests the null that the correlated random effects jointly equal zero within each equation. | | | |

| **Table C2** 2SLS estimates of the linear model of market entry with Internet-youth and Internet-education interactions | | | | | | | | | | |
| --- | --- | --- | --- | --- | --- | --- | --- | --- | --- | --- |
|  | Endogenous Internet | | Endogenous Internet & | | | | | | | |
|  |  |  | Internet × Youth | | Internet × Educated Pop | | Internet × Uneducated Pop | | | |
|  | *Contemporarymt* | *Traditionalmt* | *Contemporarymt* | *Traditionalmt* | *Contemporarymt* | *Traditionalmt* | *Contemporarymt* | | *Traditionalmt* | |
| *Internetmt* | 0.030*** | 0.017** | -0.028** | 0.007 | 0.026*** | 0.009 | 0.022** | 0.022*** | | |
|  | (0.010) | (0.007) | (0.013) | (0.007) | (0.009) | (0.007) | (0.010) | (0.008) | | |
| *Internetmt*×*Youthmt* |  |  | 0.002*** | 0.0004 |  |  |  |  | | |
|  |  |  | (0.001) | (0.0004) |  |  |  |  | | |
| *Internetmt*×*Educated Popmt* |  |  |  |  | 0.00001 | 0.00003** |  |  | | |
|  |  |  |  |  | (0.00002) | (0.00001) |  |  | | |
| *Internetmt*×*Uneducated Popmt* |  |  |  |  |  |  | 0.0003** | -0.0002 | | |
|  |  |  |  |  |  |  | (0.0001) | (0.0001) | | |
| *Immigrationmt* | -0.037** | -0.038*** | -0.023 | -0.035*** | -0.037** | -0.037** | -0.034** | -0.040*** | | |
|  | (0.018) | (0.014) | (0.018) | (0.013) | (0.018) | (0.017) | (0.017) | (0.015) | | |
| *Native Non-Whitemt* | -0.008 | -0.005 | -0.015** | -0.007 | -0.008 | -0.007 | -0.011* | -0.003 | | |
|  | (0.006) | (0.005) | (0.007) | (0.004) | (0.006) | (0.004) | (0.006) | (0.005) | | |
| *Uneducated Popmt* | 0.007*** | 0.001 | 0.005** | 0.0005 | 0.018 | 0.028** | 0.017*** | -0.006 | | |
|  | (0.002) | (0.001) | (0.002) | (0.001) | (0.017) | (0.011) | (0.005) | (0.005) | | |
| *Educated Popmt* | -0.004*** | -0.001* | -0.004*** | -0.001 | -0.006** | -0.005*** | -0.007*** | 0.001 | | |
|  | (0.001) | (0.000) | (0.001) | (0.000) | (0.003) | (0.002) | (0.001) | (0.001) | | |
| *In-Group Incomemt* | -0.011* | 0.006 | -0.024*** | 0.004 | -0.014** | -0.001 | -0.000 | -0.001 | | |
|  | (0.006) | (0.005) | (0.006) | (0.005) | (0.007) | (0.005) | (0.008) | (0.007) | | |
| *Out-Group Incomemt* | 0.005 | -0.002 | 0.008** | -0.002 | 0.005 | -0.002 | 0.006* | -0.003 | | |
|  | (0.004) | (0.003) | (0.004) | (0.003) | (0.004) | (0.003) | (0.004) | (0.003) | | |
| *Evangelicalmt* | -0.005 | -0.002 | -0.008*** | -0.002 | -0.005 | -0.002 | -0.004 | -0.003 | | |
|  | (0.003) | (0.002) | (0.003) | (0.002) | (0.003) | (0.002) | (0.003) | (0.002) | | |
| *Protestantmt* | -0.015*** | -0.007** | -0.011** | -0.006* | -0.014*** | -0.004 | -0.013*** | -0.009** | | |
|  | (0.005) | (0.003) | (0.005) | (0.003) | (0.004) | (0.003) | (0.005) | (0.004) | | |
| *Republicanmt* | 0.011*** | 0.007*** | 0.011*** | 0.007*** | 0.012*** | 0.011*** | 0.007** | 0.009*** | | |
|  | (0.003) | (0.003) | (0.003) | (0.003) | (0.005) | (0.004) | (0.003) | (0.003) | | |
| *Youthmt* | 0.059*** | 0.017 | -0.085*** | -0.007 | 0.054*** | 0.005 | 0.040* | 0.030* | | |
|  | (0.021) | (0.013) | (0.033) | (0.018) | (0.020) | (0.013) | (0.022) | (0.017) | | |
| *Klanm* | 0.058** | 0.036** | 0.053** | 0.051*** | 0.061** | 0.057*** | 0.066** | 0.055** | | |
|  | (0.026) | (0.015) | (0.025) | (0.019) | (0.027) | (0.021) | (0.026) | (0.022) | | |
| *Confederatem* | -0.060 | 0.050* | -0.076* | 0.068** | -0.069* | 0.044 | -0.062 | 0.062* | | |
|  | (0.042) | (0.027) | (0.041) | (0.032) | (0.042) | (0.033) | (0.041) | (0.036) | | |
| *Year 2010t* | -1.129*** | -0.671** | -1.416*** | -0.680** | -0.972** | -0.308 | -0.867** | -0.863*** | | |
|  | (0.423) | (0.286) | (0.462) | (0.325) | (0.400) | (0.296) | (0.420) | (0.331) | | |
| *Year 2017t* | -1.742*** | -1.054*** | -1.942*** | -1.034** | -1.522*** | -0.547 | -1.313** | -1.361*** | | |
|  | (0.597) | (0.403) | (0.613) | (0.436) | (0.561) | (0.417) | (0.598) | (0.473) | | |
| *Border 2000mt* | -0.024 | -0.145*** | -0.169** | -0.171*** | 0.010 | -0.063 | -0.015 | -0.135*** | | |
|  | (0.068) | (0.050) | (0.086) | (0.063) | (0.070) | (0.058) | (0.067) | (0.051) | | |
| *Border 2010mt* | 0.080 | 0.058 | 0.084 | 0.051 | 0.073 | 0.043 | 0.080 | 0.077 | | |
|  | (0.075) | (0.051) | (0.076) | (0.055) | (0.077) | (0.056) | (0.072) | (0.061) | | |
| *Border 2017mt* | 0.002 | 0.025 | 0.077 | 0.031 | -0.005 | 0.004 | 0.006 | 0.041 | | |
|  | (0.055) | (0.036) | (0.061) | (0.046) | (0.054) | (0.042) | (0.047) | (0.049) | | |
| Constant | -0.492** | 0.421* | 1.914** | -0.098 | -0.443** | -0.412*** | -0.306 | -0.480*** | | |
|  | (0.210) | (0.244) | (0.922) | (0.565) | (0.196) | (0.135) | (0.198) | (0.153) | | |
| Hansen J Statistic | χ2(1) = 0.741 | χ2(1) = 0.075 | χ2(2) = 7.36** | χ2(2) = 0.89 | χ2(2) = 4.57 | χ2(2) = 0.90 | χ2(2) = 0.427 | χ2(2) = 3.88 | | |
|  | (0.109) | (0.785) | (0.025) | (0.64) | (0.10) | (0.64) | (0.801) | (0.144) | | |
| CRE | F(12) =82.93*** | F(12) =31.47*** | F(14) = 71.92*** | F(14) =37.88*** | F(14) = 70.47*** | F(14) = 21.62* | F(14) = 107.19* | F(14) = 28.23** | | |
|  | (0.00) | (0.00) | (0.00) | (0.00) | (0.00) | (0.08) | (0.00) | (0.013) | | |
| HW: *Internetmt* | χ2(1) =11.42*** | χ2(1) =7.28*** | χ2(1) =4.51*** | χ2(1) = 8.01*** | χ2(1) = 6.97*** | χ2(1) = 3.55* | χ2(1) =7.51*** | χ2(1) =9.44*** | | |
|  | (0.00) | (0.01) | (0.02) | (0.00) | (0.01) | (0.06) | (0.01) | (0.00) | | |
| HW: *Internetmt*×*Youthmt* |  |  | χ2(2) = 6.38 | χ2(2) = 7.67*** |  |  |  |  | | |
|  |  |  | (0.01) | (0.01) |  |  |  |  | | |
| HW: *Internetmt & Internetmt*×*Youthmt* |  |  | χ2(2) = 16.66*** | χ2(2) = 8.14** |  |  |  |  | | |
|  |  |  | (0.00) | (0.02) |  |  |  |  | | |
| HW: *Internetmt*×*Educated Popmt* |  |  |  |  | χ2(2) = 1.07 | χ2(2) = 11.02*** |  |  | | |
|  |  |  |  |  | (0.30) | (0.00) |  |  | | |
| HW: *Internetmt & Internetmt*×*Educated Popmt* |  |  |  |  | χ2(2) = 6.78** | χ2(2) = 9.89** |  |  | | |
|  |  |  |  |  | (0.03) | (0.00) |  |  | | |
| HW: *Internetmt*×*Uneducated Popmt* |  |  |  |  |  |  | χ2(1) = 6.61** | χ2(1) = 0.81 | | |
|  |  |  |  |  |  |  | (0.0102) | (0.368) | | |
| HW: *Internetmt & Internetmt*×*Uneducated Popmt* |  |  |  |  |  |  | χ2(2) = 9.57*** | χ2(2) = 9.45*** | | |
|  |  |  |  |  |  |  | (0.01) | (0.01) | | |
| *NOTES*. 2,166 observations. Robust standard errors, clustered by commuting zone, in parentheses. P-values in parentheses for all F and Chi-Squared tests. ***Significant at the 0.01 level; **significant at the 0.05 level; *significant at the 0.1 level. Hansen J statistics test the appropriateness of the model’s overidentification restrictions. Relevance: *Internetmt*,  *Internetmt* × *Youthmt*, *Internetmt* × *Educated Popmt* and *Internetmt* × *Uneducated Popmt* F-Statistics test the null hypothesis that the coefficients of the excluded exogenous variables (*Densitymt*, *Commercialmt*, and their interactions with exogenous variables (*Densitymt* × *Youthmt*, *Commercialmt* × *Youthmt*, *Densitymt* × *Educated Popmt*, *Commercialmt* × *Educated Popmt*, *Densitymt* × *Uneducated Popmt*, and *Commercialmt* × *Uneducated Popmt*)) jointly equal zero in first-step equations. HW is the Hausman-Wu test: *Internetmt* and its interactions with exogenous variables tests the null that *Internetmt* and its interactions with exogenous variables are exogenous and jointly exogenous. | | | | | | | | | |

| **Table C3** First-step OLS estimates of the Internet and Internet-education interactions | | | | |
| --- | --- | --- | --- | --- |
|  | Endogenous Internet | Endogenous Internet and interactions | Endogenous Internet | Endogenous Internet and interactions |
|  | *Internetmt* | *Internetmt*×*Educated Popmt* | *Internetmt* | *Internetmt*×*Uneducated Popmt* |
| *Immigrationmt* | 0.946*** | 317.610 | 1.001*** | 21.271* |
|  | (0.353) | (298.336) | (0.344) | (12.071) |
| *Native Non-Whitemt* | -0.022 | 13.783 | -0.025 | 9.712*** |
|  | (0.146) | (45.733) | (0.147) | (3.330) |
| *Uneducated Popmt* | -0.066*** | -915.038*** | -0.096* | -73.001*** |
|  | (0.019) | (70.805) | (0.053) | (7.347) |
| *Educated Popmt* | 0.039*** | 95.722*** | 0.021*** | 7.269*** |
|  | (0.013) | (31.655) | (0.008) | (0.858) |
| *In-Group Incomemt* | -0.082 | 180.175** | -0.085 | -27.362*** |
|  | (0.103) | (80.444) | (0.105) | (5.056) |
| *Out-Group Incomemt* | 0.103* | 6.160 | 0.101 | -1.729 |
|  | (0.062) | (20.900) | (0.063) | (1.469) |
| *Evangelicalmt* | 0.118 | 35.147* | 0.116 | 0.592 |
|  | (0.079) | (20.500) | (0.081) | (0.651) |
| *Protestantmt* | 0.280*** | 9.910 | 0.294*** | -1.272 |
|  | (0.085) | (38.556) | (0.084) | (2.057) |
| *Conservativemt* | -0.189*** | -219.369*** | -0.204*** | 2.312* |
|  | (0.061) | (30.704) | (0.059) | (1.329) |
| *Youthmt* | -1.438*** | 1.589 | -1.429*** | 34.448*** |
|  | (0.292) | (152.254) | (0.292) | (8.757) |
| *Klanm* | -1.298*** | -282.840*** | -1.248** | -26.577*** |
|  | (0.499) | (85.625) | (0.508) | (9.159) |
| *Confederatem* | -0.382 | 405.014** | -0.657 | 2.387 |
|  | (0.782) | (175.514) | (0.809) | (18.856) |
| *Densitymt* | 0.616*** | -146.903 | 0.476*** | 29.779*** |
|  | (0.150) | (137.620) | (0.117) | (7.647) |
| *Commercialmt* | 1.596*** | 175.042 | 1.543*** | -15.389 |
|  | (0.443) | (274.820) | (0.437) | (10.916) |
| *Densitymt*×*Youthmt* |  |  |  |  |
|  |  |  |  |  |
| *Commercialmt*×*Youthmt* |  |  |  |  |
|  |  |  |  |  |
| *Densitymt*×*Educated Popmt* | -0.0003** | 0.921** |  |  |
|  | (0.0001) | (0.375) |  |  |
| *Commercialmt*×*Educated Popmt* | 0.00001 | -0.089 |  |  |
|  | (0.001) | (2.138) |  |  |
| *Densitymt*×*Uneducated Popmt* |  |  | -0.000 | -0.001 |
|  |  |  | (0.000) | (0.059) |
| *Commercialmt*×*Uneducated Popmt* |  |  | 0.005 | 3.408*** |
|  |  |  | (0.006) | (0.843) |
| *Year 2010t* | 41.009*** | -1,100.418** | 41.168*** | 179.253*** |
|  | (1.063) | (461.042) | (1.053) | (31.620) |
| *Year 2017t* | 58.204*** | -905.527 | 58.562*** | 66.614 |
|  | (1.848) | (755.020) | (1.801) | (45.304) |
| *Border 2000mt* | 1.803** | -1,553.767** | 2.055** | 73.617** |
|  | (0.883) | (714.345) | (0.906) | (34.331) |
| *Border 2010mt* | -3.384** | 281.801 | -3.159** | -46.310 |
|  | (1.332) | (478.514) | (1.347) | (31.229) |
| *Border 2017mt* | -1.135 | 524.967 | -1.054 | -22.285 |
|  | (1.595) | (484.593) | (1.605) | (25.465) |
| Constant | 7.049* | 2,336.426*** | 7.877* | -32.870 |
|  | (3.920) | (901.335) | (4.064) | (84.915) |
| Relevance | F(4, 721) =12.6*** | F(4, 721) = 1.8 | F(4, 721) = 11.9*** | F(4, 721) = 12.3*** |
|  | (0.00) | (0.13) | (0.00) | (0.00) |
| CRE | F(14, 721) =15.4*** | χ2(14, 721) =55.4*** | χ2(14, 721) = 16.8*** | χ2(14, 721) = 109.2*** |
|  | (0.00) | (0.00) | (0) | (0.00) |
| R-Squared | 0.909 | 0.977 | 0.908 | 0.966 |
| *NOTES*. 2,166 observations. Robust standard errors, clustered by commuting zone, in parentheses. P-values in parentheses for all F and Chi-Squared tests. ***Significant at the 0.01 level; **significant at the 0.05 level; *significant at the 0.1 level. Relevance F-Statistic tests the null hypothesis that the coefficients of the excluded exogenous variables (*Densitymt*, *Commercialmt*, *Densitymt*×*Youthmt*, *Commercialmt*×*Youthmt*, *Densitymt*×*Educated In-Group Popmt*, *Commercialmt* ×*Educated In-Group Popmt,* and *Bmt*) jointly equal zero within each equation. CRE tests the null that the correlated random effects jointly equal zero within each equation. | | | | |

| **Table C4** First-step OLS estimates of the Internet and immigration | | |
| --- | --- | --- |
|  | *Internetmt* | *Immigrationmt* |
| *Native Non-Whitemt* | 0.064 | 0.085*** |
|  | (0.141) | (0.014) |
| *Uneducated Popmt* | -0.064*** | -0.015*** |
|  | (0.015) | (0.004) |
| *Educated Popmt* | 0.026*** | 0.004** |
|  | (0.008) | (0.002) |
| *In-Group Incomemt* | -0.052 | 0.054*** |
|  | (0.099) | (0.010) |
| *Out-Group Incomemt* | 0.099 | -0.002 |
|  | (0.062) | (0.006) |
| *Evangelicalmt* | 0.105 | -0.011** |
|  | (0.077) | (0.005) |
| *Protestantmt* | 0.248*** | -0.048*** |
|  | (0.082) | (0.011) |
| *Republicanmt* | -0.205*** | -0.004 |
|  | (0.061) | (0.005) |
| *Youthmt* | -1.309*** | 0.103*** |
|  | (0.297) | (0.028) |
| *Densitymt* | 0.519*** | 0.056*** |
|  | (0.117) | (0.018) |
| *Commercialmt* | 1.586*** | -0.028 |
|  | (0.396) | (0.034) |
| *Bmt* | 28.342 | 21.049*** |
|  | (20.701) | (2.174) |
| *Klanm* | -1.009** | -0.128 |
|  | (0.513) | (0.205) |
| *Confederatem* | -0.370 | 0.348 |
|  | (0.828) | (0.365) |
| *Year 2010t* | 42.019*** | 0.751*** |
|  | (1.075) | (0.094) |
| *Year 2017t* | 59.699*** | 0.959*** |
|  | (1.871) | (0.158) |
| *Border 2000mt* | 2.303** | 1.133** |
|  | (0.919) | (0.511) |
| *Border 2010mt* | -2.325* | 1.643*** |
|  | (1.348) | (0.517) |
| *Border 2017mt* | 0.559 | 2.211*** |
|  | (1.666) | (0.539) |
| Constant | 7.374* | -6.794*** |
|  | (3.989) | (1.821) |
| Relevance | F(3, 721) =14.0*** | F(3, 721) =34.0*** |
|  | (0.00) | (0.00) |
| CRE | χ2(12, 721) =13.8*** | χ2(12, 721) =17.2*** |
|  | (0) | (0.00) |
| R-Squared | 0.906 | 0.758 |
| *NOTES*. 2,166 observations. Robust standard errors, clustered by commuting zone, in parentheses. P-values in parentheses for all F and Chi-Squared tests. ***Significant at the 0.01 level; **significant at the 0.05 level; *significant at the 0.1 level. Relevance F-Statistic tests the null hypothesis that the coefficients of the excluded exogenous variables (*Densitymt*, *Commercialmt*, *Densitymt*×*Youthmt*, *Commercialmt*×*Youthmt*, *Densitymt*×*Educated In-Group Popmt*, *Commercialmt*×*Educated In-Group Popmt,* and *Bmt*) jointly equal zero within each equation. CRE tests the null that the correlated random effects jointly equal zero within each equation. | | |

| **Table C5** 2SLS estimates of the linear model of market entry with Internet-youth and Internet-education interactions and census division-year fixed effects | | | | | | | | | |
| --- | --- | --- | --- | --- | --- | --- | --- | --- | --- |
| Variables | Endogenous Internet | | | Endogenous Internet & Interactions | | | | | |
|  |  |  | Internet × Youth | | | Internet × Educated Pop | | Internet × Uneducated Pop | |
|  | *Contemporarymt* | *Traditionalmt* | *Contemporarymt* | | *Traditionalmt* | *Contemporarymt* | *Traditionalmt* | *Contemporarymt* | *Traditionalmt* |
| *Internetmt* | 0.023** | 0.017** | -0.034** | | 0.006 | 0.017* | 0.007 | 0.014 | 0.022*** |
|  | (0.010) | (0.007) | (0.014) | | (0.008) | (0.009) | (0.007) | (0.010) | (0.008) |
| *Internetmt* × *Youthmt* |  |  | 0.002*** | | 0.0004 |  |  |  |  |
|  |  |  | (0.001) | | (0.0004) |  |  |  |  |
| *Internetmt* × *Educated Popmt* |  |  |  | |  | 0.000003 | 0.00003** |  |  |
|  |  |  |  | |  | (0.00002) | (0.00001) |  |  |
| *Internetmt* × *Uneducated Popmt* |  |  |  | |  |  |  | 0.0003*** | -0.0001 |
|  |  |  |  | |  |  |  | (0.0001) | (0.0001) |
| *Immigrationmt* | -0.037** | -0.042*** | -0.036* | | -0.039*** | -0.031* | -0.040** | -0.033** | -0.045*** |
|  | (0.017) | (0.014) | (0.020) | | (0.013) | (0.016) | (0.016) | (0.016) | (0.014) |
| *Native Non-Whitemt* | -0.014** | -0.009* | -0.020*** | | -0.010** | -0.013** | -0.007 | -0.018*** | -0.008 |
|  | (0.006) | (0.005) | (0.007) | | (0.005) | (0.005) | (0.004) | (0.006) | (0.005) |
| *Uneducated Popmt* | 0.005** | -0.001 | 0.004** | | -0.001 | 0.008 | 0.027** | 0.018*** | -0.006 |
|  | (0.002) | (0.001) | (0.002) | | (0.001) | (0.017) | (0.012) | (0.005) | (0.005) |
| *Educated Popmt* | -0.004*** | -0.001** | -0.004*** | | -0.001* | -0.005* | -0.005*** | -0.007*** | 0.0001 |
|  | (0.001) | (0.000) | (0.001) | | (0.000) | (0.003) | (0.002) | (0.001) | (0.001) |
| *In-Group Incomemt* | -0.018*** | 0.000 | -0.026*** | | -0.001 | -0.018*** | -0.003 | -0.007 | -0.005 |
|  | (0.006) | (0.005) | (0.007) | | (0.005) | (0.006) | (0.006) | (0.007) | (0.006) |
| *Out-Group Incomemt* | 0.007** | -0.003 | 0.007* | | -0.002 | 0.007** | -0.002 | 0.008*** | -0.003 |
|  | (0.003) | (0.003) | (0.004) | | (0.003) | (0.003) | (0.002) | (0.003) | (0.003) |
| *Evangelicalmt* | -0.003 | -0.002 | -0.003* | | -0.002 | -0.002 | -0.001 | -0.002 | -0.003 |
|  | (0.003) | (0.002) | (0.002) | | (0.001) | (0.002) | (0.001) | (0.002) | (0.002) |
| *Protestantmt* | -0.011*** | -0.006* | -0.008* | | -0.004 | -0.009** | -0.003 | -0.008* | -0.007** |
|  | (0.004) | (0.003) | (0.005) | | (0.003) | (0.004) | (0.003) | (0.004) | (0.004) |
| *Republicanmt* | 0.007*** | 0.007*** | 0.008*** | | 0.007*** | 0.007** | 0.009*** | 0.003 | 0.008*** |
|  | (0.002) | (0.002) | (0.003) | | (0.002) | (0.003) | (0.003) | (0.003) | (0.003) |
| *Youthmt* | 0.020 | 0.008 | -0.119*** | | -0.013 | 0.015 | -0.012 | 0.010 | 0.013 |
|  | (0.016) | (0.012) | (0.035) | | (0.021) | (0.018) | (0.013) | (0.016) | (0.014) |
| *Klanm* | 0.037 | 0.045** | 0.037 | | 0.044** | 0.034 | 0.047** | 0.046** | 0.047** |
|  | (0.023) | (0.019) | (0.024) | | (0.019) | (0.023) | (0.019) | (0.023) | (0.021) |
| *Confederatem* | -0.022 | 0.059 | -0.031 | | 0.069* | -0.022 | 0.058 | -0.020 | 0.060 |
|  | (0.056) | (0.042) | (0.057) | | (0.041) | (0.052) | (0.040) | (0.051) | (0.043) |
| *Year 2010t* | -0.889** | -0.616** | -1.401*** | | -0.596* | -0.619 | -0.216 | -0.477 | -0.841** |
|  | (0.424) | (0.312) | (0.490) | | (0.358) | (0.377) | (0.316) | (0.423) | (0.365) |
| *Year 2017t* | -1.355** | -1.161*** | -1.854*** | | -1.096** | -0.966* | -0.624 | -0.776 | -1.480*** |
|  | (0.619) | (0.442) | (0.664) | | (0.477) | (0.539) | (0.440) | (0.610) | (0.517) |
| *Border 2000mt* | -0.029 | -0.154*** | -0.240** | | -0.190*** | -0.010 | -0.099 | -0.021 | -0.153*** |
|  | (0.084) | (0.057) | (0.108) | | (0.072) | (0.083) | (0.061) | (0.083) | (0.057) |
| *Border 2010mt* | 0.033 | 0.026 | 0.057 | | 0.017 | 0.023 | -0.002 | 0.026 | 0.037 |
|  | (0.075) | (0.059) | (0.079) | | (0.058) | (0.076) | (0.058) | (0.070) | (0.063) |
| *Border 2017mt* | -0.034 | 0.022 | 0.099 | | 0.035 | -0.031 | -0.004 | -0.015 | 0.020 |
|  | (0.054) | (0.046) | (0.066) | | (0.049) | (0.048) | (0.043) | (0.044) | (0.052) |
| Hansen J Statistic | χ2(1) = 1.03 | χ2(1) = 0.108 | χ2(2) = 6.90** | | χ2(2) = 1.73 | χ2(2) = 5.44* | χ2(2) = 1.52 | χ2(2) = 1.50 | χ2(2) = 3.84 |
|  | (0.309) | (0.742) | (0.03) | | (0.42) | (0.07) | (0.47) | (0.472) | (0.147) |
| Relevance: *Internetmt* | χ2(2, 721) = 19.10 | χ2(2, 721) = 19.10 | χ2(4, 721) = 10.44 | | χ2(4, 721) = 10.44 | χ2(4, 721) = 12.68*** | χ2(4, 721) = 12.68*** | χ2(4, 721) =10.41*** | χ2(4, 721) = 10.41*** | |
|  | (0.00) | (0.00) | (0.00) | | (0.00) | (0.00) | (0.00) | (0.00) | (0.00) |
| Relevance: *Internetmt*×*Youthmt* |  |  | χ2(4, 721) = 9.69 | | χ2(4, 721) = 9.69 |  |  |  |  |
|  |  |  | (0.00) | | (0.00) |  |  |  |  |
| Relevance: *Internetmt*×*Educated Popmt* |  |  |  | |  | χ2(4, 721) = 1.99* | χ2(4, 721) = 1.99* |  |  |
|  |  |  |  | |  | (0.09) | (0.09) |  |  |
| Relevance: *Internetmt*×*Uneducated* |  |  |  | |  |  |  | χ2(4, 721) = 9.82*** | χ2(4, 721) = 9.82*** |
| *Popmt* |  |  |  | |  |  |  | (0.00) | (0.00) |
| CRE | F(12) =82.93*** | F(12) = 34.74*** | F(14) = 78.79*** | | F(14) = 42.45*** | F(14) = 85.49*** | F(14) = 20.16 | F(14) = 114.26*** | F(14) = 33.0 |
|  | (0.00) | (0.00) | (0.00) | | (0.00) | (0.00) | (0.12) | (0.00) | (0.00) |
| HW: *Internetmt* | χ2(1) =7.75*** | χ2(1) =7.81*** | χ2(1) =3.02* | | χ2(1) =7.30*** | χ2(1) = 3.85** | χ2(1) = 2.95* | χ2(1) = 4.05** | χ2(1) = 8.02*** |
|  | (0.005) | (0.005) | (0.08) | | (0.01) | (0.05) | (0.08) | (0.044) | (0.00) |
| HW: *Internetmt*×*Youthmt* |  |  | χ2(1) = 4.78 ** | | χ2(2) = 7.17*** |  |  |  |  |
|  |  |  | (0.03) | | (0.01) |  |  |  |  |
| HW: *Internetmt & Internetmt*×*Youthmt* |  |  | χ2(2) = 79.69*** | | χ2(2) = 7.33** |  |  |  |  |
|  |  |  | (0.00) | | (0.03) |  |  |  |  |
| HW: *Internetmt*×*Educated Popmt* |  |  |  | |  | χ2(1) = 0.31 | χ2(1) = 9.74*** |  |  |
|  |  |  |  | |  | (0.58) | (0.002) |  |  |
| HW: *Internetmt & Internetmt*×*Educated Popmt* |  |  |  | |  | χ2(2) = 3.75 | χ2(2) = 10.54*** |  |  |
|  |  |  |  | |  | (0.15) | (0.005) |  |  |
| HW: *Internetmt*×*Uneducated Popmt* |  |  |  | |  |  |  | χ2(1) = 5.554** | χ2(1) = 0.826*** |
|  |  |  |  | |  |  |  | (0.018) | (0.36) |
| HW: *Internetmt & Internetmt*×*Uneducated Popmt* |  |  |  | |  |  |  | χ2(2) = 6.44 ** | χ2(2) = 8.17** |
|  |  |  |  | |  |  |  | (0.04) | (0.02) |
|  |  |  |  | |  |  |  |  |  |
| *NOTES*. 2,166 observations. Robust standard errors, clustered by commuting zone, in parentheses. P-values in parentheses for all F and Chi-Squared tests. ***Significant at the 0.01 level; **significant at the 0.05 level; *significant at the 0.1 level. Hansen J statistics test the appropriateness of the model’s overidentification restrictions. Relevance: *Internetmt*,  *Internetmt* × *Youthmt*, *Internetmt* × *Educated Popmt* and *Internetmt* × *Uneducated Popmt* F-Statistics test the null hypothesis that the coefficients of the excluded exogenous variables (*Densitymt*, *Commercialmt*, and their interactions with exogenous variables (*Densitymt* × *Youthmt*, *Commercialmt* × *Youthmt*, *Densitymt* × *Educated Popmt*, *Commercialmt* × *Educated Popmt*, *Densitymt* × *Uneducated Popmt*, and *Commercialmt* × *Uneducated Popmt*)) jointly equal zero in first-step equations. HW are Hausman-Wu tests: *Internetmt* and its interactions with exogenous variables tests the null that *Internetmt* and its interactions with exogenous variables are exogenous and jointly exogenous. Census Division Controls indicates whether the equation includes controls for each of the nine Census division for each year in our data (*e.g.*, *Division Dm×Year 2000t*, *Division Dm ×Year 2010t*, and *Division Dm ×* *Year 2017t*, where Dm *­*is an indicator variable that identifies each Census division). Division 1: Connecticut, Maine, Massachusetts, New Hampshire, Rhode Island, and Vermont; Division 2: New Jersey, New York, and Pennsylvania; Division 3: Indiana, Illinois, Michigan, Ohio, and Wisconsin; Division 4: Iowa, Kansas, Minnesota, Missouri, Nebraska, North Dakota, and South Dakota; Division 5: Delaware, District of Columbia, Florida, Georgia, Maryland, North Carolina, South Carolina, Virginia, and West Virginia; Division 6: Alabama, Kentucky, Mississippi, and Tennessee; Division 7: Arkansas, Louisiana, Oklahoma, and Texas; Division 8: Arizona, Colorado, Idaho, New Mexico, Montana, Utah, Nevada, and Wyoming; Division 9: California, Oregon, and Washington (Hawaii and Alaska are included in Division 9, but are not included in our data). | | | | | | | | | |

**Appendix D Robustness tests of market entry**

| **Table D1** Ordered probit estimates of market entry with alternative hate group definitions | | | | | | |
| --- | --- | --- | --- | --- | --- | --- |
|  | Hate-Group Definition+ | | Two Years of Hate Data++ | | Expanded Bins+++ | |
|  | *Contemporarymt* | *Traditionalmt* | *Contemporarymt* | *Traditionalmt* | *Contemporarymt* | *Traditionalmt* |
| *Internetmt* | 0.081** | 0.047 | 0.110** | 0.061 | 0.098** | 0.079* |
|  | (0.037) | (0.034) | (0.045) | (0.040) | (0.041) | (0.042) |
| *Immigrationmt* | -0.071 | -0.100 | -0.125 | -0.161* | -0.130 | -0.239** |
|  | (0.071) | (0.082) | (0.091) | (0.085) | (0.089) | (0.102) |
| *Native Non-Whitemt* | -0.063** | -0.046 | -0.070* | -0.041 | -0.052 | -0.061* |
|  | (0.030) | (0.030) | (0.037) | (0.032) | (0.037) | (0.036) |
| *Uneducated Popmt* | 0.006 | 0.002 | 0.015** | 0.003 | 0.006 | 0.001 |
|  | (0.004) | (0.005) | (0.007) | (0.004) | (0.005) | (0.005) |
| *Educated Popmt* | -0.001 | 0.000 | -0.006** | -0.002 | -0.006*** | -0.002 |
|  | (0.002) | (0.002) | (0.003) | (0.003) | (0.002) | (0.003) |
| *In-Group Incomemt* | -0.035 | 0.027 | -0.072** | 0.028 | -0.064* | 0.039 |
|  | (0.028) | (0.025) | (0.032) | (0.031) | (0.033) | (0.032) |
| *Out-Group Incomemt* | 0.046** | -0.020 | 0.046** | -0.034 | 0.057** | -0.028 |
|  | (0.021) | (0.017) | (0.023) | (0.022) | (0.025) | (0.021) |
| *Evangelicalmt* | -0.009 | -0.011 | -0.007 | -0.014 | -0.012 | -0.013 |
|  | (0.014) | (0.012) | (0.015) | (0.014) | (0.016) | (0.015) |
| *Protestantmt* | -0.036 | -0.014 | -0.050 | -0.001 | -0.056* | -0.025 |
|  | (0.024) | (0.026) | (0.030) | (0.026) | (0.031) | (0.031) |
| *Republicanmt* | 0.011 | 0.026** | 0.034** | 0.029* | 0.025* | 0.035** |
|  | (0.012) | (0.013) | (0.014) | (0.015) | (0.014) | (0.016) |
| *Youthmt* | 0.137* | -0.062 | 0.178* | 0.054 | 0.179** | 0.045 |
|  | (0.083) | (0.071) | (0.098) | (0.081) | (0.088) | (0.093) |
| *Klan 1924m* | 0.431*** | 0.257** | 0.454*** | 0.307** | 0.494*** | 0.353*** |
|  | (0.122) | (0.108) | (0.126) | (0.124) | (0.130) | (0.126) |
| *Confederatem* | 0.125 | 0.482*** | 0.088 | 0.446*** | -0.122 | 0.380** |
|  | (0.168) | (0.156) | (0.172) | (0.161) | (0.174) | (0.176) |
| *Year 2010t* | -0.088 | -0.718** | -0.220 | -0.374 | -0.137 | -0.650 |
|  | (0.252) | (0.356) | (0.262) | (0.319) | (0.260) | (0.669) |
| *Year 2017t* | 0.226 | 0.190 | 0.143 | 0.308 | 0.279 | 0.532* |
|  | (0.283) | (0.229) | (0.312) | (0.265) | (0.304) | (0.289) |
| *Border 2000mt* | 0.402 | 0.435* | 0.322 | 0.234 | -0.193 | 0.346 |
|  | (0.282) | (0.256) | (0.584) | (0.775) | (1.765) | (0.775) |
| *Border 2010mt* | -3.360** | -2.090 | -4.421** | -2.485 | -3.971** | -3.210* |
|  | (1.602) | (1.464) | (1.919) | (1.707) | (1.767) | (1.807) |
| *Border 2017mt* | -4.911** | -3.625* | -7.169*** | -4.050* | -6.408*** | -5.100** |
|  | (2.253) | (2.077) | (2.691) | (2.393) | (2.485) | (2.531) |
| One Group (*μi1*) | 3.160*** | 1.544 | 2.234** | 2.399** | 3.067*** | 2.630** |
|  | (0.877) | (0.956) | (0.971) | (0.967) | (0.960) | (1.027) |
| Two Groups (*μi2*) | 4.240*** | 2.520*** | 3.227*** | 3.463*** | 4.151*** | 3.815*** |
|  | (0.883) | (0.953) | (0.976) | (0.965) | (0.966) | (1.015) |
| Three Groups (*μi3*) | 4.869*** |  | 3.994*** |  | 4.840*** | 4.764*** |
|  | (0.888) |  | (0.987) |  | (0.982) | (1.034) |
| Four Groups (*μi4*) |  |  |  |  | 5.380*** |  |
|  |  |  |  |  | (0.975) |  |
| Five Groups (*μi5*) |  |  |  |  | 6.059*** |  |
|  |  |  |  |  | (0.987) |  |
| *Estimated vmt* | -0.076** | -0.049 | -0.101** | -0.068* | -0.090** | -0.084** |
|  | (0.037) | (0.034) | (0.045) | (0.040) | (0.041) | (0.042) |
| *Estimated ρ* | 0.195*** |  | 0.128** |  | 0.095 |  |
|  | (0.058) |  | (0.061) |  | (0.065) |  |
| *NOTES*. 2,166 observations. Estimated regressions include Mundlak controls for unobserved heterogeneity. Robust standard errors for estimated coefficients, clustered by commuting zone and bootstrapped with 1,000 iterations, in parentheses. P-value of the Chi-Squared statistic for the Wald test reported in parentheses. ***Significant at the 0.01 level; **significant at the 0.05 level; *significant at the 0.1 level. Joint Control Function tests the null that the control function coefficients jointly equal zero across equations. Control Function tests the null that the control function coefficients jointly equal zero within each equation. Joint CRE tests the null that the correlated random effects jointly equal zero across equations. CRE tests the null that the correlated random effects jointly equal zero within each equation. Coefficient Equality tests the null that all the payoff coefficients are the same across the contemporary and traditional equations. +Differences in estimated coefficients from the Contemporary and Traditional Hate Group equations (*C* – *T*). Robust standard errors for differences in estimated coefficients, clustered by commuting zone and bootstrapped with 1,000 iterations, in parentheses. | | | | | | |

| **Table D2** Cross-partial effects of the Internet on the probability of market entry from linear specifications with Internet-youth and Internet-education interactions | | | | | | | | | |
| --- | --- | --- | --- | --- | --- | --- | --- | --- | --- |
|  | A: By Share In-Group Youth | | | B: By Educated In-Group Size | | | C: By Uneducated In-Group Size | | |
| *Contemporary Groups* | Percentiles | | | | | | | | |
|  | 5th | 50th | 95th | 5th | 50th | 95th | 5th | 50th | 95th |
| Marginal Effect | 0.019** | 0.029*** | 0.038*** | 0.026*** | 0.027*** | 0.034** | 0.022** | 0.024** | 0.041*** |
|  | (0.008) | (0.01) | (0.011) | (0.009) | (0.009) | (0.016) | (0.010) | (0.010) | (0.011) |
|  | Differences in Percentiles | | | | | | | | |
|  | 95th – 50th | 50th – 5th | 95th – 50th | 95th – 50th | 50th – 5th | 95th – 50th | 95th – 50th | 50th – 5th | 95th – 5th |
|  | 0.009*** | 0.01*** | 0.019*** | 0.007 | 0.0005 | 0.008 | 0.017** | 0.002** | 0.019** |
|  | (0.003) | (0.003) | (0.006) | (0.012) | (0.0008) | (0.013) | (0.008) | (0.001) | (0.009) |
| *Traditional Groups* | Percentiles | | | | | | | | |
|  | 5th | 50th | 95th | 5th | 50th | 95th | 5th | 50th | 95th |
| Marginal Effect | 0.014** | 0.016** | 0.017** | 0.009 | 0.010 | 0.030** | 0.022*** | 0.021*** | 0.010 |
|  | (0.006) | (0.007) | (0.008) | (0.007) | (0.007) | (0.010) | (0.008) | (0.008) | (0.009) |
|  | Differences in Percentiles | | | | | | | | |
|  | 95th – 50th | 50th – 5th | 95th – 5th | 95th – 50th | 50th – 5th | 95th – 5th | 95th – 50th | 50th – 5th | 95th – 5th |
|  | 0.001 | 0.002 | 0.003 | 0.020** | 0.001** | 0.021** | -0.011 | -0.001 | -0.012 |
|  | (0.001) | (0.002) | (0.003) | (0.008) | (0.0005) | (0.008) | (0.008) | (0.001) | (0.009) |
| *NOTES.* Estimated marginal effects are for an increase in *Internetmt* on the probability of observing an additional entrant in the average market, evaluated at the 5th, 50th, and 95th percentiles for *Youth* and the *Educated* (*In-Group*) *Population.* Standard errors for the estimated effects derived using the delta method, in parentheses. ***Significant at the 0.01 level; **significant at the 0.05 level; *significant at the 0.1 level. | | | | | | | | | |

| **Table D3** Cross-partial effects of the Internet on the probability of market entry from linear specifications with Internet-youth and Internet-education interactions and census division-year fixed effects | | | | | | | | | |
| --- | --- | --- | --- | --- | --- | --- | --- | --- | --- |
|  | A: By Share In-Group Youth | | | B: By Educated In-Group Size | | | C: By Uneducated In-Group Size | | |
| *Contemporary Groups* | Percentiles | | | | | | | | |
|  | 5th | 50th | 95th | 5th | 50th | 95th | 5th | 50th | 95th |
| Marginal Effect | 0.016* | 0.027*** | 0.037*** | 0.017* | 0.017** | 0.019 | 0.014 | 0.016* | 0.037*** |
|  | (0.009) | (0.010) | (0.012) | (0.009) | (0.009) | (0.015) | (0.01) | (0.010) | (0.012) |
|  | Differences in Percentiles | | | | | | | | |
|  | 95th – 50th | 50th – 5th | 95th – 5th | 95th – 50th | 50th – 5th | 95th – 5th | 95th – 50th | 50th – 5th | 95th – 5th |
|  | 0.010*** | 0.011*** | 0.021*** | 0.002 | 0.0002 | 0.003 | 0.021*** | 0.002*** | 0.024*** |
|  | (0.003) | (0.003) | (0.006) | (0.012) | (0.0008) | (0.013) | (0.008) | (0.001) | (0.009) |
| *Traditional Groups* | Percentiles | | | | | | | | |
|  | 5th | 50th | 95th | 5th | 50th | 95th | 5th | 50th | 95th |
| Marginal Effect | 0.013** | 0.015** | 0.017** | 0.007 | 0.009 | 0.028*** | 0.021*** | 0.021*** | 0.012 |
|  | (0.006) | (0.007) | (0.008) | (0.007) | (0.007) | (0.008) | (0.01) | (0.01) | (0.01) |
|  | Differences in Percentiles | | | | | | | | |
|  | 95th – 50th | 50th – 5th | 95th – 5th | 95th – 50th | 50th – 5th | 95th – 5th | 95th – 50th | 50th – 5th | 95th – 5th |
|  | 0.002 | 0.002 | 0.003 | 0.019** | 0.001** | 0.020** | -0.01 | -0.001 | -0.010 |
|  | (0.002) | (0.002) | (0.003) | (0.008) | (0.0005) | (0.008) | (0.01) | (0.001) | (0.001) |
| *NOTES.* Estimated marginal effects are for an increase in *Internetmt* on the probability of observing an additional entrant in the average market, evaluated at the 5th, 50th, and 95th percentiles for *Youth* and the *Educated* (*In-Group*) *Population.* Standard errors for the estimated effects derived using the delta method, in parentheses. ***Significant at the 0.01 level; **significant at the 0.05 level; *significant at the 0.1 level. | | | | | | | | | |

1. Savage, Department of Economics, University of Colorado at Boulder, [scott.savage@colorado.edu](mailto:scott.savage@colorado.edu); Wimmer, Department of Economics, University of Nevada at Las Vegas, [bradley.wimmer@unlv.edu](mailto:bradley.wimmer@unlv.edu). [↑](#footnote-ref-1)
2. Following the SPLC’s convention, these counts equal the number of states where groups without well-defined headquarters are active. This may overcount the number of groups without well-defined headquarters when these groups include members from more than one state. These data are counted at the state level. [↑](#footnote-ref-2)
3. Available at <https://www.fcc.gov/form-477-county-data-internet-access-services>. [↑](#footnote-ref-3)
4. See the NTIA’s September 2001 Internet and Computer Use supplement to the Current Population Survey and the October 2010 Internet Use supplement to the Current Population Survey. [↑](#footnote-ref-4)
